# Supplementary material for: Principles of reproducible metabolite profiling of enriched lymphocytes in tumors and ascites from human ovarian cancer
Source: Springer Nature journal article supplement (doi:10.1038/s41596-022-00729-z), 2022-08-19
Supplement: MOESM2 [file 41596_2022_729_MOESM2_ESM19.pdf]

## Reporting Summary

Nature Research wishes to improve the reproducibility of the work that we publish. This form provides structure for consistency and transparency in reporting. For further information on Nature Research policies, see our [Editorial Policies](#) and the [Editorial Policy Checklist](#).

### Statistics

For all statistical analyses, confirm that the following items are present in the figure legend, table legend, main text, or Methods section.

n/a Confirmed

- ☒ ☐ The exact sample size ( $n$ ) for each experimental group/condition, given as a discrete number and unit of measurement
- ☒ ☐ A statement on whether measurements were taken from distinct samples or whether the same sample was measured repeatedly
- ☒ ☐ The statistical test(s) used AND whether they are one- or two-sided  
*Only common tests should be described solely by name; describe more complex techniques in the Methods section.*
- ☒ ☐ A description of all covariates tested
- ☒ ☐ A description of any assumptions or corrections, such as tests of normality and adjustment for multiple comparisons
- ☒ ☐ A full description of the statistical parameters including central tendency (e.g. means) or other basic estimates (e.g. regression coefficient) AND variation (e.g. standard deviation) or associated estimates of uncertainty (e.g. confidence intervals)
- ☒ ☐ For null hypothesis testing, the test statistic (e.g.  $F$ ,  $t$ ,  $r$ ) with confidence intervals, effect sizes, degrees of freedom and  $P$  value noted  
*Give  $P$  values as exact values whenever suitable.*
- ☒ ☐ For Bayesian analysis, information on the choice of priors and Markov chain Monte Carlo settings
- ☐ ☒ For hierarchical and complex designs, identification of the appropriate level for tests and full reporting of outcomes
- ☒ ☐ Estimates of effect sizes (e.g. Cohen's  $d$ , Pearson's  $r$ ), indicating how they were calculated

*Our web collection on [statistics for biologists](#) contains articles on many of the points above.*

### Software and code

Policy information about [availability of computer code](#)

**Data collection** Flow cytometry data was collected using SpectroFlo, metabolomics data was collected using MultiQuant (v2.1), single cell RNA-seq data was collected using Illumina HiSeq 4000 28x98bp.

**Data analysis** Flow cytometry data was analyzed using FlowJo (v10). Figures were created using GraphPad Prism 8. Statistical analysis was done using Microsoft Excel. Metabolomics data was analyzed using MultiQuant (v 2.1). R scripts (described in methods) to reproduce metabolomic and single cell RNA-seq analyses are available at [https://github.com/vicDRC/BCCJL01\\_ovarian](https://github.com/vicDRC/BCCJL01_ovarian).

For manuscripts utilizing custom algorithms or software that are central to the research but not yet described in published literature, software must be made available to editors and reviewers. We strongly encourage code deposition in a community repository (e.g. GitHub). See the Nature Research [guidelines for submitting code & software](#) for further information.

### Data

Policy information about [availability of data](#)

All manuscripts must include a [data availability statement](#). This statement should provide the following information, where applicable:

- Accession codes, unique identifiers, or web links for publicly available datasets
- A list of figures that have associated raw data
- A description of any restrictions on data availability

Raw sequencing data will be deposited at EGA (EGAS00001004829). Processed data files and scripts to reproduce metabolomics and scRNA-seq analyses are available at [https://github.com/vicDRC/BCCJL01\\_ovarian](https://github.com/vicDRC/BCCJL01_ovarian). Flow cytometry data is deposited at flowrepository (FR-FCM-Z2NH).

## Field-specific reporting

Please select the one below that is the best fit for your research. If you are not sure, read the appropriate sections before making your selection.

☒ Life sciences ☐ Behavioural & social sciences ☐ Ecological, evolutionary & environmental sciences

For a reference copy of the document with all sections, see [nature.com/documents/nr-reporting-summary-flat.pdf](https://www.nature.com/documents/nr-reporting-summary-flat.pdf)

## Life sciences study design

All studies must disclose on these points even when the disclosure is negative.

|                 |                                                                                                                                          |
|-----------------|------------------------------------------------------------------------------------------------------------------------------------------|
| Sample size     | No sample size calculations were performed.                                                                                              |
| Data exclusions | No data were excluded from the analysis.                                                                                                 |
| Replication     | Three technical replicates were run for each metabolomics sample. The average of these three replicates was used for hypothesis testing. |
| Randomization   | Order of sample processing was randomized for LC-MS/MS.                                                                                  |
| Blinding        | No blinding was performed.                                                                                                               |

## Reporting for specific materials, systems and methods

We require information from authors about some types of materials, experimental systems and methods used in many studies. Here, indicate whether each material, system or method listed is relevant to your study. If you are not sure if a list item applies to your research, read the appropriate section before selecting a response.

### Materials & experimental systems

| n/a                                 | Involved in the study                                           |
|-------------------------------------|-----------------------------------------------------------------|
| <input type="checkbox"/>            | <input checked="" type="checkbox"/> Antibodies                  |
| <input checked="" type="checkbox"/> | <input type="checkbox"/> Eukaryotic cell lines                  |
| <input checked="" type="checkbox"/> | <input type="checkbox"/> Palaeontology and archaeology          |
| <input checked="" type="checkbox"/> | <input type="checkbox"/> Animals and other organisms            |
| <input type="checkbox"/>            | <input checked="" type="checkbox"/> Human research participants |
| <input checked="" type="checkbox"/> | <input type="checkbox"/> Clinical data                          |
| <input checked="" type="checkbox"/> | <input type="checkbox"/> Dual use research of concern           |

### Methods

| n/a                                 | Involved in the study                              |
|-------------------------------------|----------------------------------------------------|
| <input checked="" type="checkbox"/> | <input type="checkbox"/> ChIP-seq                  |
| <input type="checkbox"/>            | <input checked="" type="checkbox"/> Flow cytometry |
| <input checked="" type="checkbox"/> | <input type="checkbox"/> MRI-based neuroimaging    |

## Antibodies

|                 |                                                                                                                                             |
|-----------------|---------------------------------------------------------------------------------------------------------------------------------------------|
| Antibodies used | Information on antibodies can be found in the methods.                                                                                      |
| Validation      | Panels were optimized prior to use on patient specimens. Fluorescent minus one (FMO) controls were used to ensure proper gating on samples. |

## Human research participants

Policy information about [studies involving human research participants](#)

|                            |                                                                                                                                                                                                                                                                                                           |
|----------------------------|-----------------------------------------------------------------------------------------------------------------------------------------------------------------------------------------------------------------------------------------------------------------------------------------------------------|
| Population characteristics | Described in the original research article DOI: 10.1126/sciadv.abe1174.                                                                                                                                                                                                                                   |
| Recruitment                | Patient specimens and clinical data were obtained through the BC Cancer Tumour Tissue Repository (TTR), certified by the Canadian Tissue Repository Network.                                                                                                                                              |
| Ethics oversight           | All specimens and clinical data were obtained with either informed written consent or a formal waiver of consent under protocols approved by the Research Ethics Board of the BC Cancer Agency and the University of British Columbia (H07-00463). Samples are stored in a certified BioBank (BRC-00290). |

Note that full information on the approval of the study protocol must also be provided in the manuscript.

Plots

- Confirm that:
- ☒ The axis labels state the marker and fluorochrome used (e.g. CD4-FITC).
  - ☒ The axis scales are clearly visible. Include numbers along axes only for bottom left plot of group (a 'group' is an analysis of identical markers).
  - ☒ All plots are contour plots with outliers or pseudocolor plots.
  - ☒ A numerical value for number of cells or percentage (with statistics) is provided.

Methodology

|                           |                                                                         |
|---------------------------|-------------------------------------------------------------------------|
| Sample preparation        | Sample preparation is described in the methods section.                 |
| Instrument                | Cytek Aurora; 3L-16V-14B-8R configuration                               |
| Software                  | SpectroFlo and FlowJo V10 were used to analyze the flow cytometry data. |
| Cell population abundance | Cells were not sorted by flow cytometry.                                |
| Gating strategy           | Example gating strategy can be found in figure 7.                       |

☒ Tick this box to confirm that a figure exemplifying the gating strategy is provided in the Supplementary Information.
