# Supplementary material for: Principles of reproducible metabolite profiling of enriched lymphocytes in tumors and ascites from human ovarian cancer
Source: Springer Nature journal article supplement (doi:10.1038/s41596-022-00729-z), 2022-08-19
Supplement: MOESM3 [file 41596_2022_729_MOESM3_ESM20.xlsx]

## Sheet: 1. Enrichment methods
Supplemental Table 1. Enrichment methods.
Technique	Isolation name	Vendor
Column Based
	StemSEPTM	STEMCELL Technologies
	MACS® Micobeads	Miltenyi
	Dynabead cell isolation	ThermoFisher Scientific
	MojoSortTM	BioLegend
Column Free
	EasySepTM	STEMCELL Technologies
	MagniSortTM	ThermoFisher Scientific
	BACSTM	Akadeum
Automated
	RoboSepTM	STEMCELL Technologies
	autoMACS® Pro Separator	Miltenyi

## Sheet: 2. Control ice vs bead data
Supplemental Table 2. Raw abundance values of metabolites detected from 1 million T cells left on ice (Ice) versus cells bead sorted (Bead sort) in triplicate (A-C).
HMDB	PubChem	KEGG	Metabolite	Ice A	Ice B	Ice C	Bead sort A	Bead sort B	Bead sort C
HMDB00634	643798	C02226	Citraconic acid	9.66752e+07	8.33414e+07	1.03089e+08	1.00373e+08	9.29074e+07	9.43061e+07
HMDB01864	159664	C00902	2-Ketohexanoic acid	8.55706e+07	7.46443e+07	8.95414e+07	9.15427e+07	8.19686e+07	8.87469e+07
HMDB00172	6306	C00407	L-Isoleucine	1.57988e+07	1.41903e+07	1.77417e+07	7.29868e+06	5.03469e+06	6.99263e+06
HMDB00094	311	C00158	Citric acid	8.48057e+06	7.5167e+06	8.39188e+06	980648	2.62587e+06	3.17743e+06
HMDB00086	71920	C00670	Glycerophosphocholine	9.9669e+06	1.33628e+07	1.23051e+07	5.41743e+06	4.817e+06	4.60493e+06
HMDB03337	975	C00127	Oxidized glutathione	4.50411e+06	4.43963e+06	3.99529e+06	2.18795e+06	2.60452e+06	3.03341e+06
HMDB00158	6057	C00082	L-Tyrosine	1.94453e+06	1.70691e+06	1.80405e+06	850887	604415	695974
HMDB00902	5893	C00003	NAD	4.34092e+06	5.16345e+06	3.97608e+06	2.79599e+06	2.28913e+06	2.30997e+06
HMDB00097	305	C00114	Choline	6.81108e+06	8.13619e+06	8.87395e+06	6.21382e+06	4.91859e+06	6.68845e+06
HMDB00606	439391	C01087	2-Hydroxyglutaric acid	814454	817180	824573	542707	690468	840309
HMDB00895	187	C01996	Acetylcholine	7.15248e+06	7.37425e+06	7.28991e+06	4.34698e+06	3.14027e+06	2.96915e+06
HMDB00254	1110	C00042	Succinic acid	4.74933e+06	5.3007e+06	5.7335e+06	5.20002e+06	4.55953e+06	5.09786e+06
HMDB00162	145742	C00148	L-Proline	3.98089e+06	3.86016e+06	5.19626e+06	1.99012e+06	1.43461e+06	1.75425e+06
HMDB00159	6140	C00079	L-Phenylalanine	2.64412e+06	2.25828e+06	3.31844e+06	1.39014e+06	1.08125e+06	1.26121e+06
HMDB00201	1	C02571	L-Acetylcarnitine	1.19649e+07	1.0983e+07	1.40733e+07	5.29513e+06	3.07956e+06	4.82386e+06
HMDB00168	6267	C00152	L-Asparagine	1.57829e+06	1.33029e+06	1.59091e+06	684927	548823	796826
HMDB00156	222656	C00149	L-Malic acid	459695	385235	548915	273781	245567	232151
HMDB00641	5961	C00064	L-Glutamine	429575	223342	547369	53643.1	35143.9	45786.6
HMDB03339	23327	C00217	D-Glutamic acid	1.53856e+06	1.05002e+06	1.56758e+06	625486	517714	470816
HMDB00050	60961	C00212	Adenosine	2.36599e+06	3.60896e+06	2.67906e+06	2.74662e+06	4.07154e+06	4.03416e+06
HMDB00121	6037	C00504	Folic acid	1000	1000	1000	1000	14796.4	16185.7
HMDB03070	8742	C00493	Shikimic acid	160924	113525	188697	106816	89711.8	131119
HMDB00112	119	C00334	Gamma-Aminobutyric acid	2.98515e+06	3.15277e+06	4.71351e+06	2.82481e+06	2.13962e+06	2.52215e+06
HMDB00045	6083	C00020	Adenosine monophosphate	454608	536701	413531	267311	434723	339669
HMDB00517	6322	C00062	L-Arginine	72132.8	77216	81860.9	72594.5	29130.5	58274.8
HMDB00267	7405	C01879	Pyroglutamic acid	123123	113305	109893	33757.3	33679.5	53413.2
HMDB00214	6262	C00077	Ornithine	116085	116082	107297	77694.2	36997.2	55498.6
HMDB01173	439176	C00170	5'-Methylthioadenosine	3.49296e+06	3.13667e+06	2.98397e+06	2.51827e+06	2.16601e+06	1.97718e+06
HMDB00446	192590	C12989	N-Alpha-acetyllysine	74917.3	109842	140816	68445.2	55962.5	46710.7
HMDB00883	6287	C00183	L-Valine	191919	238630	317942	153084	102439	161185
HMDB00089	6175	C00475	Cytidine	148454	151696	258531	111459	175741	104060
NA	NA	NA	cADP-ribose	112840	133187	89714.1	48555.5	61969.7	50403.4
HMDB00175	8582	C00130	Inosinic acid	816788	1.28361e+06	940326	525363	725619	534578
HMDB01565	1014	C00588	Phosphorylcholine	1.17897e+06	949838	898165	655774	587968	600077
HMDB00239	1054	C00314	Pyridoxine	35147.5	40228.9	32675.2	1000	1000	1000
HMDB00235	1130	C00378	Thiamine	63818.3	51797.5	67512.4	43005.1	25899.6	34225.3
HMDB00696	6137	C00073	L-Methionine	112384	161867	135505	43936.6	35149.6	52260.5
HMDB00905	12599	C00360	Deoxyadenosine monophosphate	910591	653014	393586	324421	535059	453177
HMDB00738	798	C00463	Indole	157256	279776	296909	125328	50015.8	99785.9
HMDB01257	1102	C00315	Spermidine	176663	469409	218750	86019.7	318183	319547
HMDB01096	278	C00169	Carbamoyl phosphate	98964.2	73066.3	111457	53646.6	31449.3	26359.4
HMDB00125	124886	C00051	Glutathione	380191	677633	302698	194859	405816	392503
HMDB01341	6022	C00008	ADP	414198	500308	261143	128100	118616	429149
HMDB00190	107689	C00186	L-Lactic acid	798248	731634	806770	479129	546647	575071
HMDB00688	6426851	-	Isovalerylcarnitine	485144	471730	557984	345935	282572	282804
HMDB00210	988	C00864	Pantothenic acid	121632	121165	105907	61044.8	53646.2	55959.8
HMDB00062	10917	C00487	Carnitine	222421	264970	594745	302865	179890	263160
HMDB00126	439162	C00093	Glycerol 3-phosphate	105206	64976.3	123017	54574	40465.8	34220
HMDB01066	440018	C03451	S-Lactoylglutathione	246962	188690	140601	82324.8	1000	50177.6
HMDB01488	938	C00253	Nicotinic acid_Vit B3	257352	324916	372288	298933	144293	218049
HMDB00824	107738	C03017	Propionylcarnitine	878198	1.13217e+06	1.1407e+06	608141	501780	933778
HMDB00128	763	C00581	Guanidoacetic acid	166584	212571	241542	88330.4	136007	140613
HMDB01406	936	C00153	Niacinamide	671087	412058	542942	421614	272843	306166
HMDB03331	27476	C02494	1-Methyladenosine	44860.6	31447.6	55030	20349.3	1000	33759
HMDB00034	190	C00147	Adenine	224757	229845	205341	128565	206259	149137
HMDB01511	587	C02305	Phosphocreatine	62898.6	40235.1	33296.3	22661.9	14335.1	27282.9
HMDB00719	12647	C00263	L-Homoserine	67517.1	41155.1	61049	49020.2	13872.2	28206.5
HMDB00195	6021	C00294	Inosine	567453	870880	632670	1.12031e+06	1.24499e+06	815278
HMDB00095	6131	C00055	Cytidine monophosphate	163710	243721	170639	144287	160015	109613
HMDB01431	1052	C00534	Pyridoxamine	43471.8	55030.6	54116.3	1000	1000	1000
HMDB02005	847	-	Methionine sulfoxide	52717.8	30520.6	50410.5	25434	18960.2	37921.8
HMDB00251	1123	C00245	Taurine	85784.2	44858.9	78155.5	1000	18035.5	32834.1
HMDB00211	892	C00137	Myoinositol	181523	115618	140367	50871	47631	37921.7
HMDB01397	6804	C00144	Guanosine monophosphate	609589	612306	557272	341589	725616	545815
HMDB00177	6274	C00135	L-Histidine	1000	1000	1000	12021.6	1000	11098.4
HMDB00191	5960	C00049	L-Aspartic acid	83705.5	60583.3	63361.1	1000	24508.5	24511.1
HMDB00092	673	C01026	Dimethylglycine	1.22679e+06	1.3551e+06	2.1929e+06	1.65781e+06	1.08747e+06	1.22804e+06
HMDB00748	643327	C05607	L-3-Phenyllactic acid	340383	273790	332719	166258	161866	150986
HMDB01067	5255	C12270	N-Acetylaspartylglutamic acid	30523.6	18038.9	23120.9	28674	33299.2	30983.9
HMDB00133	6802	C00387	Guanosine	191920	344535	189610	326739	393098	362569
HMDB00273	5789	C00214	Thymidine	1000	1000	23126	1000	40233.4	1000
HMDB00812	65065	C01042	N-Acetyl-L-aspartic acid	123023	100594	157706	95735.4	54569	61506.3
HMDB01414	1045	C00134	Putrescine	402006	279005	304167	269162	201662	239095
HMDB00766	88064	C00624	N-Acetyl-L-alanine	191510	184073	211803	86475.5	106597	104980
HMDB00157	790	C00262	Hypoxanthine	166494	134569	132030	56879.2	45322	45785.3
HMDB00132	764	C00242	Guanine	31447.9	61281.8	29136.5	23585.6	93885.6	61980.2
HMDB01185	16757548	C00019	S-Adenosylmethionine	55960.3	35149.2	55497.6	54574	24050.9	46704.2
HMDB00625	10690	C00257	Gluconic acid	16185.5	1000	29599	1000	1000	1000
HMDB00064	586	C00300	Creatine	39777.6	81165.9	75847.1	36536.7	31909.5	59891.8
HMDB02250	168381	-	Dodecanoylcarnitine	108224	96197.6	128569	127643	145679	116893
HMDB00357	441	C01089	3-Hydroxybutyric acid	376464	359331	438659	650709	438429	1000
HMDB01488	938	C00253	Nicotinic acid_pos-109	1000	37915.9	45091.5	1000	1000	1000
HMDB05066	53477791	-	Tetradecanoylcarnitine	41624.3	33070.1	41621.7	1000	44401.5	36306.6
HMDB00014	13711	C00881	Deoxycytidine	1000	1000	14798.8	1000	1000	1000
HMDB00791	11953814	C02838	L-Octanoylcarnitine	98278.1	102174	115386	74570.4	50641.8	60043.4
HMDB02174	6438156	C05776	Cobalamin	9249.63	1000	13412	1000	19884.3	43007.5
HMDB00756	3246938	-	L-Hexanoylcarnitine	420646	366757	457393	264084	166845	253264
HMDB00562	588	C00791	Creatinine	1000	1000	1000	1000	1000	48790.9

## Sheet: 3. Control ice vs bead analysis
Supplemental Table 3. Differentially abundant metabolites between iced and bead-sorted T cells, based on output of differential expression analysis conducted with limma on log10 metabolite TICs.
Positive fold changes represent metabolites that are more abundant in iced samples.
Metabolite	log10 fold change	Average Metabolite Abundance	Adjusted P Value
Pyridoxamine	1.96516	-1.00118	6.14e-05
Pyridoxine	1.28657	-1.41243	0.000230389
2-Ketohexanoic acid	-0.928861	0.100744	0.00277211
L-Tyrosine	1.10245	-0.871539	0.00363801
L-Glutamine	1.74551	-1.04299	0.00363801
Hypoxanthine	0.92994	0.402021	0.0039872
L-Isoleucine	1.04377	-0.860457	0.0039872
L-Proline	0.834953	0.577685	0.0040747
L-Phenylalanine	0.766373	-0.53807	0.00624152
Citraconic acid	-0.764318	0.0375778	0.00624152
L-Asparagine	0.743166	-0.778693	0.00795636
L-Acetylcarnitine	0.804589	1.01989	0.00819729
Pyroglutamic acid	1.2639	-1.01837	0.00819729
D-Glutamic acid	0.689123	0.850086	0.00819729
Glycerophosphocholine	0.728371	0.63384	0.00856767
Pantothenic acid	0.635903	-0.850571	0.00856767
L-3-Phenyllactic acid	0.452646	0.540693	0.00856767
Myoinositol	0.544336	0.795341	0.00933275
L-Methionine	0.564692	-0.460822	0.0109598
Isovalerylcarnitine	0.481999	0.809915	0.0115369
Acetylcholine	0.647272	0.997866	0.0128371
Dodecanoylcarnitine	-1.38204	0.0875903	0.0357671
Carbamoyl phosphate	0.486885	0.942896	0.0465078
Citric acid	1.36166	0.0438019	0.0504256
N-Acetyl-L-alanine	0.258542	0.704723	0.0623447
Thiamine	0.39075	-1.08293	0.0713012
Ornithine	0.723006	-0.841468	0.0783998
Glycerol 3-phosphate	0.360909	1.12782	0.0787573
L-Hexanoylcarnitine	0.272095	0.884617	0.0831326
Indole	1.0215	-0.630025	0.0831326
NAD	0.299807	0.869293	0.0831326
Inosine	-0.415351	0.920358	0.0831326
N-Acetylaspartylglutamic acid	-0.348643	0.845889	0.0831326
L-Malic acid	0.196953	0.760282	0.0922174
cADP-ribose	0.305567	0.853599	0.0962626
Phosphorylcholine	0.274322	1.05313	0.0979371
L-Histidine	-1.19164	-0.784147	0.105594
L-Valine	0.503407	-0.586545	0.108513
Guanosine	-0.379327	0.676747	0.108513
L-Octanoylcarnitine	0.190434	0.869011	0.115118
N-Alpha-acetyllysine	0.550936	-0.948682	0.116962
Folic acid	-0.741765	-1.37045	0.120987
L-Lactic acid	0.239439	-0.617961	0.130975
Phosphocreatine	0.419831	0.992772	0.131793
Oxidized glutathione	0.237691	0.867772	0.13549
N-Acetyl-L-aspartic acid	0.228932	1.02268	0.13809
Succinic acid	-0.289537	0.156973	0.148221
Gluconic acid	1.29245	-0.491011	0.150312
Nicotinic acid_pos-109	1.17674	-0.37672	0.151731
L-Aspartic acid	1.20996	-0.201617	0.173976
Adenosine	-0.344863	0.49914	0.177921
Taurine	1.18216	0.648645	0.177921
S-Lactoylglutathione	1.13186	0.724239	0.191681
Inosinic acid	0.332353	1.39936	0.214554
Guanidoacetic acid	0.205259	-0.162256	0.214554
L-Homoserine	0.697883	-0.154248	0.214554
Niacinamide	0.183666	0.428791	0.214554
Methionine sulfoxide	0.549656	-1.20829	0.265681
Gamma-Aminobutyric acid	0.21134	1.08537	0.272417
1-Methyladenosine	0.863133	0.274186	0.272417
5'-Methylthioadenosine	0.126579	0.939722	0.272417
Propionylcarnitine	0.15692	0.867878	0.313057
Creatinine	-0.990266	-0.182164	0.330398
Putrescine	0.307256	0.551371	0.330398
ADP	0.238467	0.787047	0.367735
Nicotinic acid_Vit B3	0.288606	0.484454	0.378201
L-Arginine	0.252097	-1.23076	0.391413
Shikimic acid	0.148302	-1.29571	0.391413
Choline	0.132591	1.03354	0.408616
Guanine	-0.357267	1.00427	0.418139
Deoxycytidine	0.481198	-0.535923	0.455548
Tetradecanoylcarnitine	0.605875	-0.101249	0.467232
Adenine	0.271103	-0.463829	0.467232
3-Hydroxybutyric acid	0.559831	0.570856	0.484005
Creatine	0.150071	0.792605	0.484005
Cytidine	0.160823	0.440935	0.527867
Cytidine monophosphate	0.080244	0.881706	0.572991
Adenosine monophosphate	0.107785	1.0865	0.575971
Cobalamin	-0.558233	0.292474	0.575971
Deoxyadenosine monophosphate	0.0974337	0.676185	0.615161
Carnitine	0.163023	0.526435	0.717709
Glutathione	0.0520685	1.06123	0.788801
Thymidine	-0.164549	-0.522689	0.848394
Spermidine	0.105629	0.7423	0.931736
Guanosine monophosphate	-0.0136544	0.986264	0.931736
Dimethylglycine	-0.0135675	1.08613	0.95808
S-Adenosylmethionine	0.00929881	1.23913	0.95808
2-Hydroxyglutaric acid	0.0143417	-0.275035	0.95808

## Sheet: 4. Original metabolites (204)
Supplemental Table 4. Original list of 204 metabolites.
HMDB	PubChem	KEGG	Metabolite
HMDB03331	27476	C02494	1-Methyladenosine
HMDB00001	92105	C01152	1-Methylhistidine
HMDB00699	457	C02918	1-Methylnicotinamide
HMDB00232	1066	C03722	Quinolinic acid_pos-4
HMDB00991	69522	-	DL-2-Aminooctanoic acid
HMDB00014	13711	C00881	Deoxycytidine
HMDB00017	6723	C00847	4-Pyridoxic acid
HMDB01149	137	C00430	5-Aminolevulinic acid
HMDB02339	151018	-	5-Methoxytryptophan
HMDB01107	445404	-	7-Methylguanosine
HMDB03333	73318	-	8-Hydroxy-deoxyguanosine
HMDB00201	1	C02571	L-Acetylcarnitine
HMDB00895	187	C01996	Acetylcholine
HMDB00446	192590	C12989	N-Alpha-acetyllysine
HMDB00034	190	C00147	Adenine
HMDB00050	60961	C00212	Adenosine
HMDB01432	199	C00179	Agmatine
HMDB01517	65110	C04677	AICAR
HMDB00161	5950	C00041	L-Alanine
HMDB00462	204	C01551	Allantoin
HMDB00510	469	C00956	Aminoadipic acid
HMDB00517	6322	C00062	L-Arginine
HMDB00168	6267	C00152	L-Asparagine
HMDB00191	5960	C00049	L-Aspartic acid
HMDB00043	247	C00719	Betaine
HMDB01252	249	C00576	Betaine Aldehyde
HMDB00030	171548	C00120	Biotin
HMDB00039	264	C00246	Butyric acid
HMDB02322	273	C01672	Cadaverine
HMDB00062	10917	C00487	Carnitine
HMDB02250	168381	-	Dodecanoylcarnitine
HMDB05066	53477791	-	Tetradecanoylcarnitine
HMDB00222	11953816	C02990	L-Palmitoylcarnitine
HMDB00848	6426855	-	Stearoylcarnitine
HMDB00824	107738	C03017	Propionylcarnitine
HMDB02013	439829	C02862	Butyrylcarnitine
HMDB00688	6426851	-	Isovalerylcarnitine
HMDB00756	3246938	-	L-Hexanoylcarnitine
HMDB00791	11953814	C02838	L-Octanoylcarnitine
HMDB00097	305	C00114	Choline
HMDB00904	9750	C00327	Citrulline
HMDB00095	6131	C00055	Cytidine monophosphate
HMDB00064	586	C00300	Creatine
HMDB00562	588	C00791	Creatinine
HMDB00099	439258	C02291	L-Cystathionine
HMDB00574	5862	C00097	L-Cysteine
HMDB00192	67678	C00491	L-Cystine
HMDB00089	6175	C00475	Cytidine
HMDB00630	597	C00380	Cytosine
HMDB00905	12599	C00360	Deoxyadenosine monophosphate
HMDB00071	65058	C05512	Deoxyinosine
HMDB00012	13712	C00526	Deoxyuridine
HMDB00092	673	C01026	Dimethylglycine
HMDB01248	643975	C00016	FAD
HMDB03075	10680	C10043	Flavone
HMDB00121	6037	C00504	Folic acid
HMDB01514	439213	C00329	Glucosamine
HMDB01254	439217	C00352	Glucosamine 6-phosphate
HMDB00641	5961	C00064	L-Glutamine
HMDB00086	71920	C00670	Glycerophosphocholine
HMDB00123	750	C00037	Glycine
HMDB01397	6804	C00144	Guanosine monophosphate
HMDB00125	124886	C00051	Glutathione
HMDB03337	975	C00127	Oxidized glutathione
HMDB00128	763	C00581	Guanidoacetic acid
HMDB00132	764	C00242	Guanine
HMDB00133	6802	C00387	Guanosine
HMDB00177	6274	C00135	L-Histidine
HMDB02205	177491	C16511	L-Homocysteic acid
HMDB00742	778	C05330	Homocysteine
HMDB00719	12647	C00263	L-Homoserine
HMDB00707	979	C01179	4-Hydroxyphenylpyruvic acid
HMDB00725	5810	C01157	4-Hydroxyproline
HMDB00157	790	C00262	Hypoxanthine
HMDB01525	795	C01589	Imidazole
HMDB02024	96215	C02835	Imidazoleacetic acid
HMDB00175	8582	C00130	Inosinic acid
HMDB00738	798	C00463	Indole
HMDB00734	15030923	C00331	Indoleacrylic acid
HMDB00195	6021	C00294	Inosine
HMDB00684	161166	C00328	L-Kynurenine
HMDB00172	6306	C00407	L-Isoleucine
HMDB01451	6112	C00725	(R)-lipoic acid
HMDB00182	5962	C00047	L-Lysine
HMDB00696	6137	C00073	L-Methionine
HMDB02005	847	-	Methionine sulfoxide
HMDB00211	892	C00137	Myoinositol
HMDB00812	65065	C01042	N-Acetyl-L-aspartic acid
HMDB01067	5255	C12270	N-Acetylaspartylglutamic acid
HMDB02064	122356	C02714	N-Acetylputrescine
HMDB00902	5893	C00003	NAD
HMDB00217	5886	C00006	NADP
HMDB01539	123831	C03626	Asymmetric dimethylarginine
HMDB01406	936	C00153	Niacinamide
HMDB01488	938	C00253	Nicotinic acid_pos-109
HMDB03011	99478	C00979	O-Acetylserine
HMDB00214	6262	C00077	Ornithine
HMDB00210	988	C00864	Pantothenic acid
HMDB00210	988	C00864	Pantothenic acid
HMDB00159	6140	C00079	L-Phenylalanine
HMDB01565	1014	C00588	Phosphorylcholine
HMDB00070	849	C00408	Pipecolic acid
HMDB12283	1028	C00254	Prephenate
HMDB00162	145742	C00148	L-Proline
HMDB13305	75612	-	Propionylcholine
HMDB01366	1044	C15587	Purine
HMDB01414	1045	C00134	Putrescine
HMDB01431	1052	C00534	Pyridoxamine
HMDB00239	1054	C00314	Pyridoxine
HMDB00232	1066	C03722	Quinolinic acid_pos-125
HMDB00244	493570	C00255	Riboflavin
HMDB01185	16757548	C00019	S-Adenosylmethionine
HMDB00187	5951	C00065	L-Serine
HMDB03070	8742	C00493	Shikimic acid
HMDB01066	440018	C03451	S-Lactoylglutathione
HMDB01173	439176	C00170	5'-Methylthioadenosine
HMDB01257	1102	C00315	Spermidine
HMDB01256	1103	C00750	Spermine
HMDB00027	1125	C00272	Tetrahydrobiopterin
HMDB00235	1130	C00378	Thiamine
HMDB00273	5789	C00214	Thymidine
HMDB00262	1135	C00178	Thymine
HMDB01325	440120	C03793	N6,N6,N6-Trimethyl-L-lysine
HMDB00929	6305	C00078	L-Tryptophan
HMDB00158	6057	C00082	L-Tyrosine
HMDB00935	17473	C00167	Uridine diphosphate glucuronic acid
HMDB00300	1174	C00106	Uracil
HMDB00294	1176	C00086	Urea
HMDB00289	1175	C00366	Uric acid
HMDB00883	6287	C00183	L-Valine
HMDB00299	64959	C01762	Xanthosine
HMDB00112	119	C00334	Gamma-Aminobutyric acid
HMDB01488	938	C00253	Nicotinic acid_Vit B3
HMDB02174	6438156	C05776	Cobalamin
HMDB00397	19	C00196	2-Pyrocatechuic acid
HMDB01294	186004	C01159	2,3-Diphosphoglyceric acid
HMDB00232	1066	C03722	Quinolinic acid_neg-3
HMDB00669	11970	C05852	Ortho-Hydroxyphenylacetic acid
HMDB00402	5280523	C02504	2-Isopropylmalic acid
HMDB01864	159664	C00902	2-Ketohexanoic acid
HMDB00362	59	-	2-Phosphoglyceric acid
HMDB00357	441	C01089	3-Hydroxybutyric acid
HMDB01316	91493	C00345	6-Phosphogluconic acid
HMDB00072	643757	C00417	cis-Aconitic acid
HMDB01178	192	C00301	Adenosine diphosphate ribose
HMDB01341	6022	C00008	ADP
HMDB00208	51	C00026	Oxoglutaric acid
HMDB00019	49	C00141	Alpha-ketoisovaleric acid
HMDB00045	6083	C00020	Adenosine monophosphate
HMDB00044	54670067	C00072	Ascorbic acid
NA	NA	NA	cADP-ribose
HMDB01096	278	C00169	Carbamoyl phosphate
HMDB00634	643798	C02226	Citraconic acid
HMDB00094	311	C00158	Citric acid
HMDB01351	439287	C00672	Deoxyribose 1-phosphate
HMDB03349	439216	C00337	L-Dihydroorotic acid
HMDB01473	668	C00111	Dihydroxyacetone phosphate
HMDB01058	172313	C00354	Fructose 1,6-bisphosphate
HMDB00134	444972	C00122	Fumaric acid
HMDB01401	5958	C00092	Glucose 6-phosphate
HMDB00645	123912	C00446	Galactose 1-phosphate
HMDB01095	439211	C00325	GDP-L-fucose
HMDB00663	33037	C00818	Glucaric acid
HMDB00625	10690	C00257	Gluconic acid
HMDB00122	5793	C00031	D-Glucose
HMDB00127	444791	C00191	D-Glucuronic acid
HMDB03339	23327	C00217	D-Glutamic acid
HMDB01051	751	C02154	Glyceraldehyde
HMDB00139	439194	C00258	Glyceric acid
HMDB00119	760	C00048	Glyoxylic acid
HMDB00606	439391	C01087	2-Hydroxyglutaric acid
HMDB00746	83697	-	Hydroxyisocaproic acid
HMDB03320	69867	C19837	Indole-3-carboxylic acid
HMDB00190	107689	C00186	L-Lactic acid
HMDB00156	222656	C00149	L-Malic acid
HMDB00691	867	C00383	Malonic acid
HMDB01167	880	C00546	Pyruvaldehyde
HMDB00766	88064	C00624	N-Acetyl-L-alanine
HMDB00215	439174	C00140	N-Acetyl-D-glucosamine
HMDB03357	439232	C00437	N-Acetylornithine
HMDB00226	967	C00295	Orotic acid
HMDB00748	643327	C05607	L-3-Phenyllactic acid
HMDB02359	69475	-	Phenylpropiolic acid
HMDB01511	587	C02305	Phosphocreatine
HMDB00263	1005	C00074	Phosphoenolpyruvic acid
HMDB01721	106	C01005	DL-O-Phosphoserine
HMDB00500	135	C00156	4-Hydroxybenzoic acid
HMDB00267	7405	C01879	Pyroglutamic acid
HMDB00243	1060	C00022	Pyruvic acid
HMDB01548	439167	C00117	D-Ribose 5-phosphate
HMDB00939	439155	C00021	S-Adenosylhomocysteine
HMDB01068	22833559	C00281	D-Sedoheptulose 7-phosphate
HMDB00126	439162	C00093	Glycerol 3-phosphate
HMDB00254	1110	C00042	Succinic acid
HMDB00251	1123	C00245	Taurine
HMDB00295	6031	C00015	Uridine 5'-diphosphate
HMDB00302	18068	C00052	Uridine diphosphategalactose
HMDB00290	445675	C00043	Uridine diphosphate-N-acetylglucosamine
HMDB00288	6030	C00105	Uridine 5'-monophosphate
HMDB00296	6029	C00299	Uridine
HMDB00292	1188	C00385	Xanthine
HMDB01554	73323	C00655	Xanthylic acid
HMDB01423	6816	C00010	CoA
HMDB01423	6816	C00010	CoA

## Sheet: 5. Patient metabolies (99)
Supplemental Table 5. List of metabolites detected in patient samples.
HMDB	PubChem	KEGG	Metabolite
HMDB00201	1	C02571	L-Acetylcarnitine
HMDB00688	6426851	-	Isovalerylcarnitine
HMDB00159	6140	C00079	L-Phenylalanine
HMDB00195	6021	C00294	Inosine
HMDB01173	439176	C00170	5'-Methylthioadenosine
HMDB00158	6057	C00082	L-Tyrosine
HMDB00902	5893	C00003	NAD
HMDB00094	311	C00158	Citric acid
HMDB00050	60961	C00212	Adenosine
HMDB00086	71920	C00670	Glycerophosphocholine
HMDB00824	107738	C03017	Propionylcarnitine
HMDB00175	8582	C00130	Inosinic acid
HMDB01864	159664	C00902	2-Ketohexanoic acid
HMDB00634	643798	C02226	Citraconic acid
HMDB00097	305	C00114	Choline
HMDB03337	975	C00127	Oxidized glutathione
HMDB00133	6802	C00387	Guanosine
HMDB00172	6306	C00407	L-Isoleucine
HMDB01257	1102	C00315	Spermidine
HMDB00606	439391	C01087	2-Hydroxyglutaric acid
HMDB00254	1110	C00042	Succinic acid
HMDB00045	6083	C00020	Adenosine monophosphate
HMDB00895	187	C01996	Acetylcholine
HMDB00089	6175	C00475	Cytidine
HMDB00905	12599	C00360	Deoxyadenosine monophosphate
HMDB00062	10917	C00487	Carnitine
HMDB03331	27476	C02494	1-Methyladenosine
HMDB01397	6804	C00144	Guanosine monophosphate
HMDB01565	1014	C00588	Phosphorylcholine
HMDB01351	439287	C00672	Deoxyribose 1-phosphate
HMDB03070	8742	C00493	Shikimic acid
HMDB00157	790	C00262	Hypoxanthine
HMDB02250	168381	-	Dodecanoylcarnitine
HMDB00095	6131	C00055	Cytidine monophosphate
HMDB00446	192590	C12989	N-Alpha-acetyllysine
HMDB00848	6426855	-	Stearoylcarnitine
HMDB00299	64959	C01762	Xanthosine
HMDB01185	16757548	C00019	S-Adenosylmethionine
HMDB00791	11953814	C02838	L-Octanoylcarnitine
HMDB00162	145742	C00148	L-Proline
HMDB00641	5961	C00064	L-Glutamine
HMDB00168	6267	C00152	L-Asparagine
HMDB02005	847	-	Methionine sulfoxide
HMDB00156	222656	C00149	L-Malic acid
HMDB00699	457	C02918	1-Methylnicotinamide
HMDB00517	6322	C00062	L-Arginine
HMDB00684	161166	C00328	L-Kynurenine
HMDB00112	119	C00334	Gamma-Aminobutyric acid
HMDB00064	586	C00300	Creatine
HMDB02013	439829	C02862	Butyrylcarnitine
HMDB00812	65065	C01042	N-Acetyl-L-aspartic acid
HMDB05066	53477791	-	Tetradecanoylcarnitine
HMDB01554	73323	C00655	Xanthylic acid
HMDB00756	3246938	-	L-Hexanoylcarnitine
HMDB00883	6287	C00183	L-Valine
HMDB03339	23327	C00217	D-Glutamic acid
HMDB00191	5960	C00049	L-Aspartic acid
HMDB00210	988	C00864	Pantothenic acid
HMDB01341	6022	C00008	ADP
HMDB00121	6037	C00504	Folic acid
HMDB01325	440120	C03793	N6,N6,N6-Trimethyl-L-lysine
HMDB00562	588	C00791	Creatinine
HMDB00296	6029	C00299	Uridine
HMDB00182	5962	C00047	L-Lysine
HMDB00738	798	C00463	Indole
NA	NA	NA	cADP-ribose
HMDB00719	12647	C00263	L-Homoserine
HMDB00292	1188	C00385	Xanthine
HMDB01488	938	C00253	Nicotinic acid_Vit B3
HMDB00211	892	C00137	Myoinositol
HMDB00014	13711	C00881	Deoxycytidine
HMDB00273	5789	C00214	Thymidine
HMDB01096	278	C00169	Carbamoyl phosphate
HMDB00132	764	C00242	Guanine
HMDB00288	6030	C00105	Uridine 5'-monophosphate
HMDB00071	65058	C05512	Deoxyinosine
HMDB00235	1130	C00378	Thiamine
HMDB00251	1123	C00245	Taurine
HMDB00034	190	C00147	Adenine
HMDB01406	936	C00153	Niacinamide
HMDB00748	643327	C05607	L-3-Phenyllactic acid
HMDB00190	107689	C00186	L-Lactic acid
HMDB00696	6137	C00073	L-Methionine
HMDB00134	444972	C00122	Fumaric acid
HMDB00139	439194	C00258	Glyceric acid
HMDB00746	83697	-	Hydroxyisocaproic acid
HMDB00128	763	C00581	Guanidoacetic acid
HMDB00691	867	C00383	Malonic acid
HMDB00939	439155	C00021	S-Adenosylhomocysteine
HMDB01414	1045	C00134	Putrescine
HMDB01058	172313	C00354	Fructose 1,6-bisphosphate
HMDB00070	849	C00408	Pipecolic acid
HMDB00092	673	C01026	Dimethylglycine
HMDB00766	88064	C00624	N-Acetyl-L-alanine
HMDB01431	1052	C00534	Pyridoxamine
HMDB00161	5950	C00041	L-Alanine
HMDB00043	247	C00719	Betaine
HMDB00001	92105	C01152	1-Methylhistidine
HMDB00500	135	C00156	4-Hydroxybenzoic acid
